# Supplementary material
Source: PubMed Central journal article supplement (PMC3845117)
Supplement: 1316830110_pnas.201316830SI.pdf [file 1316830110_pnas.201316830SI.pdf]

# Supporting Information

Fan et al. 10.1073/pnas.1316830110

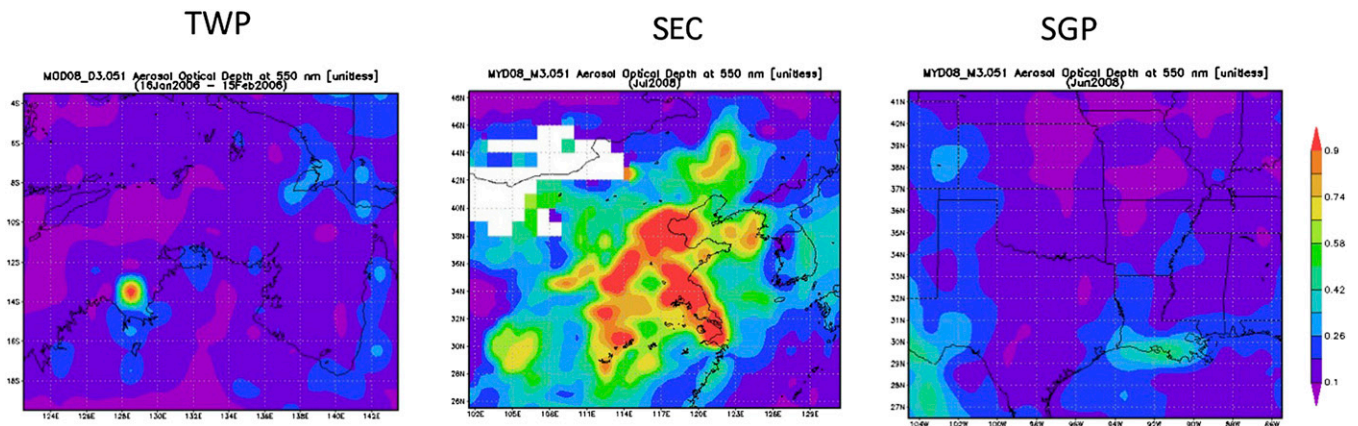

**Fig. S1.** Aerosol optical depth (AOD) averaged over the 1-mo time period at tropical western Pacific (TWP), southeastern China (SEC), and the U.S. southern Great Plains (SGP). At TWP and SGP, air is relatively clean with similar AODs in the range of 0.1–0.25, whereas AOD at SEC is more than 6 times larger in general.

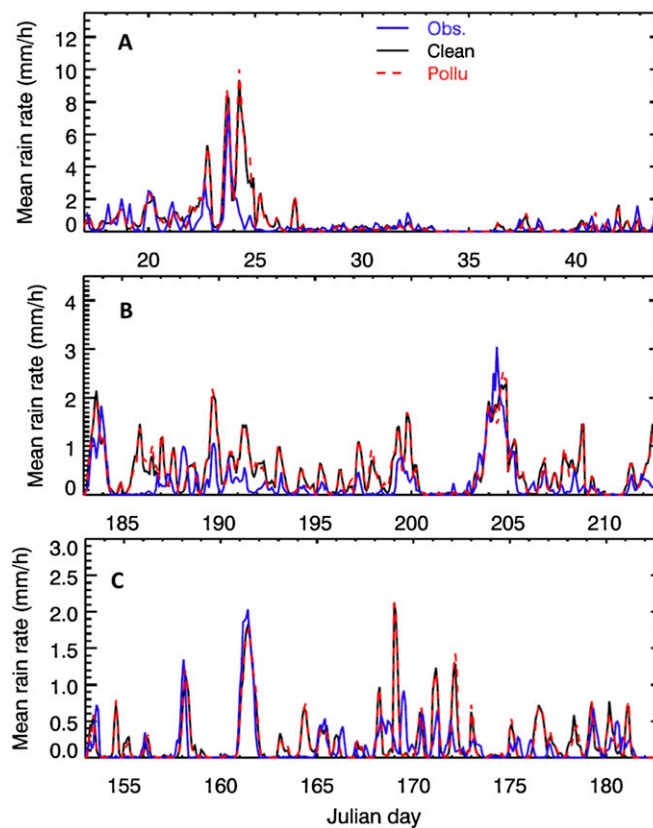

**Fig. S2.** Comparison of times series of rain rates from both clean and polluted simulations with observations at (A) TWP, (B) SEC, and (C) SGP. Refer to *Materials and Methods* for the data details.
